# Supplementary material for: Tunable luminescence properties of the novel Tm3+- and Dy3+-codoped LiLa(MoO4)x(WO4)2−x phosphors for white light-emitting diodes
Source: Royal Society of Chemistry journal article supplement (doi:10.1039/c4ra15643a), 2014-12-08
Supplement: c4ra15643a1.pdf [file c4ra15643a1.pdf]

### Supporting Information

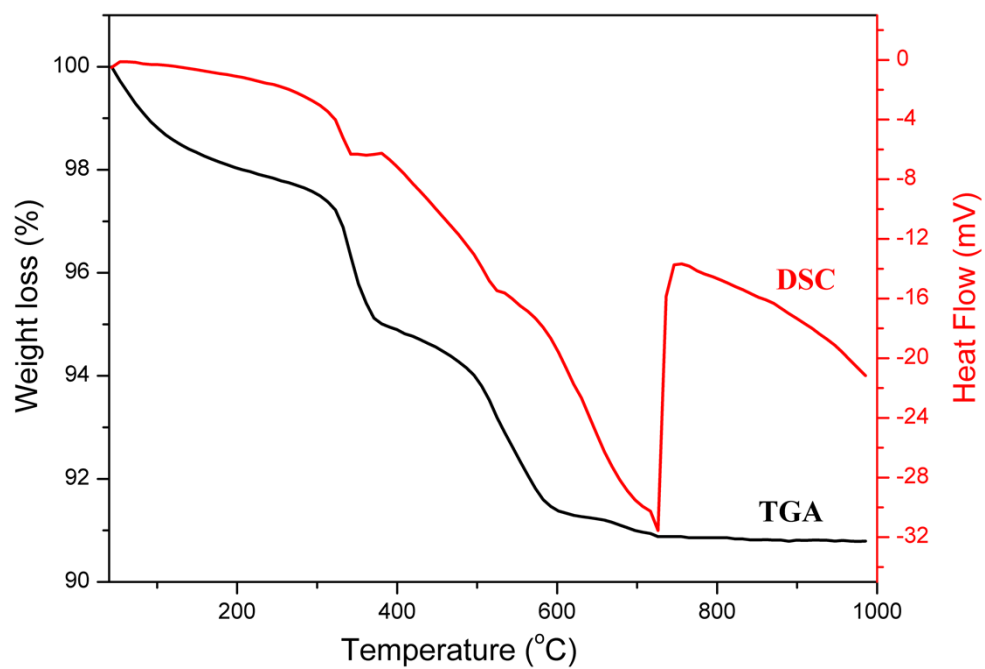

Fig. S1 TGA-DSC curves of the raw materials ( $\text{Li}_2\text{CO}_3$ ,  $\text{La}_2\text{O}_3$  and  $\text{WO}_3$ ) after grinding.

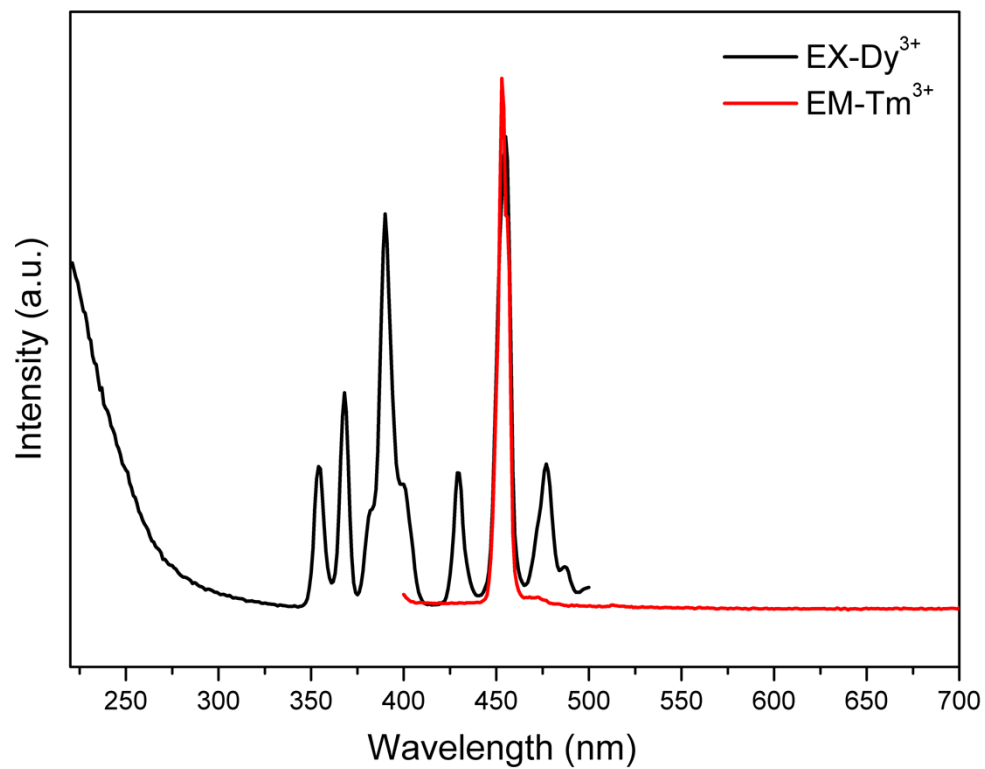

Fig. S2 Spectral overlap between the excitation spectrum of  $\text{LiLa}(\text{WO}_4)_2:0.04\text{Dy}^{3+}$  and emission spectrum of  $\text{LiLa}(\text{WO}_4)_2:0.04\text{Tm}^{3+}$ .
